# Supplementary material for: Versatile 1D-structured Co 3 O 4 –Co/NC@N–carbon nanotubes for high-performance lithium storage
Source: Royal Society of Chemistry journal article supplement (doi:10.1039/d5cc02934a), 2025-01-01
Supplement: d5cc02934a1.pdf [file d5cc02934a1.pdf]

Electronic Supplementary Information (ESI) for Chemical  
Communications This journal is (c) The Royal Society of Chemistry  
2025

**Versatile 1D structured Co<sub>3</sub>O<sub>4</sub>–Co/NC@N–carbon nanotubes for  
high-performance lithium storage**

Linan Yang,<sup>a,1</sup> Chengjie Zhang,<sup>a,1</sup> Liuyang Cao,<sup>a,1</sup> Hongjin Li,<sup>a</sup> Hongbo Li,<sup>b</sup> Zhanjun Yang,<sup>a,\*</sup> Juan Li<sup>a,\*</sup>

<sup>a</sup> School of Chemistry and Chemical Engineering, Yangzhou University, Yangzhou 225002, P.R. China

<sup>b</sup> School of Chemistry and Chemical Engineering, Yancheng Institute of Technology, Yancheng 224051, P. R. China.

**Experimental**

**Materials and Reagents.** All of the electrolytes and Whatman glass fiber (GF/D) were sourced from DodoChem Co., Ltd. Ferric chloride hexahydrate (FeCl<sub>3</sub>·6H<sub>2</sub>O), cobaltous nitrate hexahydrate (Co(NO<sub>3</sub>)<sub>2</sub>·6H<sub>2</sub>O), 2-methylimidazole (2-MI), methyl orange, pyrrole monomer, metallic lithium foil, N-Methyl-2-pyrrolidone (NMP), methanol, ethanol, polyvinylidene fluoride (PVDF) and acetylene black were purchased from Shanghai Sinopharm Co., Ltd. No further processing is applied to any of the chemicals.

**Instruments.** Scanning electron microscopy (SEM, Zeiss-Supra 55) and transmission electron microscopy (TEM, JEM-2100) were used to observe the structure and size of the materials. High-resolution transmission electron microscopy (HRTEM, Tecnai G2 F30 S-TWIN) was used to further obtain the internal structure details and element distribution information of the material. Polycrystalline powder X-ray diffractometer (XRD, D8 Advance) and Raman spectroscopy (Renishaw, Renishaw In Via, excitation wavelength 532 nm) were used to characterize the crystalline structure and properties of the materials. X-ray photoelectron spectroscopy (XPS, ThermoFisher

Scientific ESCALAB250Xi) was used to characterize the elemental composition, chemical and electronic states of the materials. The thermogravimetric analysis analyzer (Pyris 1 TGA) was used to measure the content of each component in the material, and the heating rate was  $10\text{ }^{\circ}\text{C min}^{-1}$ , in the temperature range of room temperature to  $800^{\circ}\text{C}$ . The specific surface area and pore structure of the materials were analyzed by  $\text{N}_2$  absorption/desorption analyzer (Micromeritics ASAP 2020).

**Preparation of nitrogen-doped carbon nanotubes (NCNTs).** 0.082 g methyl orange and 0.676 g  $\text{FeCl}_3 \cdot 6\text{H}_2\text{O}$  were dissolved in 25 mL deionized water, respectively, and a uniform solution was prepared by ultrasonic dispersion. The two solutions were mixed and stirred in an ice bath. Then 115  $\mu\text{L}$  pyrrole monomer was slowly added and stirred at  $0^{\circ}\text{C}$  for 12 h. After the reaction, the black precipitate was centrifugally washed with ethanol and deionized water several times, and the product was dried overnight in the vacuum oven at  $60^{\circ}\text{C}$ . Finally, the obtained product was heated in a tube furnace at a rate of  $5\text{ }^{\circ}\text{C min}^{-1}$  to  $700^{\circ}\text{C}$  in an Ar atmosphere and maintained at this temperature for 2 h to prepare NCNTs.

**Preparation of ZIF-67@NCNTs and 1D structured  $\text{Co}_3\text{O}_4\text{-Co/NC@NCNTs}$  composite materials.** The NCNTs prepared above were added to 20 mL methanol, and dispersed uniformly by ultrasound. And then 0.086 g  $\text{Co}(\text{NO}_3)_2 \cdot 6\text{H}_2\text{O}$  was added and stirred for 1 h to obtain solution A. Subsequently, 0.685 g 2-MI was added to 20 mL methanol, and a uniform solution B was obtained by ultrasound. Next, solution B was slowly added to solution A. After reaction for 3 h under stirring conditions, then it was left to stand for 24 h. Finally, the ZIF-67@NCNTs composite was centrifuged with ethanol for several times and dried overnight at  $60^{\circ}\text{C}$  in the vacuum oven. The ZIF-67@NCNTs composite prepared in the previous step was heat treated in argon atmosphere of  $550^{\circ}\text{C}$  for 2 h to obtain the final 1D structured  $\text{Co}_3\text{O}_4\text{-Co/NC@NCNTs}$  with the heating rate of  $2\text{ }^{\circ}\text{C min}^{-1}$ .

**Electrochemical measurements.** The prepared electrode materials, acetylene black and PVDF were mixed according to the mass ratio of 7:2:1, and the solvent NMP was added and stirred magnetically for 8 h to prepare the slurry. The prepared slurry was evenly coated on the Cu foil and kept at  $120^{\circ}\text{C}$  in the vacuum oven for 12 h. After

coating, they are cut into a circular electrode sheet with a diameter of 1.6 cm. Finally, the electrodes were weighed and the average load of active substances in the electrodes was  $1.22 \text{ mg cm}^{-2}$ . The model 2032 batteries were assembled in a glove box filled with Ar, and then left to rest for 12 h after assembly. Xinwei battery test system was used to test the constant current charge and discharge of the battery. Under different current density test conditions, the battery rate performance was studied by charge/ discharge test, and the cycle stability was observed by 100 and 500 cycles at  $0.1 \text{ A g}^{-1}$  and  $1.0 \text{ A g}^{-1}$  current density, respectively. The cyclic voltammetry (CV) tests were carried out with Chenhua electrochemistry workstation, and the test voltage ranges were set to 0.01–3 V, and the scanning speed was set to  $0.2\text{--}1.0 \text{ mV s}^{-1}$ . And the electrochemical impedance spectroscopy (EIS) tests were also carried out in the electrochemical workstation, and the scanning frequency was 0.01 Hz–100 KHz.

**The morphology of PPy.**

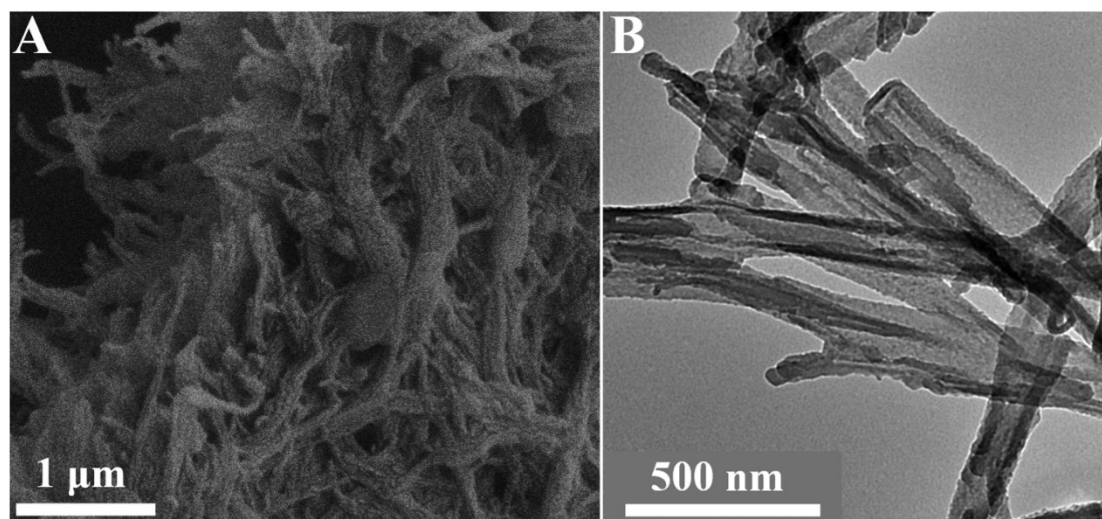

**Figure S1.** (A) SEM and (B) TEM images of the PPy.

**N<sub>2</sub> isothermal adsorption/desorption measurements of NCNTs, ZIF-67@NCNTs and Co<sub>3</sub>O<sub>4</sub>-Co/NC@NCNTs composite and thermogravimetric analysis of 1D structured Co<sub>3</sub>O<sub>4</sub>-Co/NC@NCNTs composite materials.**

Through the N<sub>2</sub> adsorption/desorption tests, the specific surface area of NCNTs is 63.89 m<sup>2</sup>/g. And there are many macropore (>50 nm) in NCNTs through the pore size distribution curve (Fig. S2A). ZIF-67@NCNTs has a specific surface area of 1162.95 m<sup>2</sup>/g, and the adsorption isotherms conform to the characteristics of Type I, which indicates that is a microporous material (Fig. S2B). The high surface area and the main micropores may also lead to some side reactions, such as the reduction decomposition of the electrolyte and the formation of the solid electrolyte interface layer, which results in a larger initial irreversible capacity loss and a lower coulomb efficiency. However, Co<sub>3</sub>O<sub>4</sub>-Co/NC@NCNTs composite materials (Fig. S2C) have more mesoporous structure than the two compared materials. This can be due to the fact that a large amount of gas was produced during the pyrolysis process, resulting in the formation of a large number of mesoporous structures inside the composite material. The increased mesoporous structure can enhance the wettability and contact area of the electrolyte, accelerate Li<sup>+</sup> diffusion and electron transport. Meanwhile, such a structure can alleviate volume expansion, improve the stability of the electrode structure, and thereby achieve good electrochemical performance.

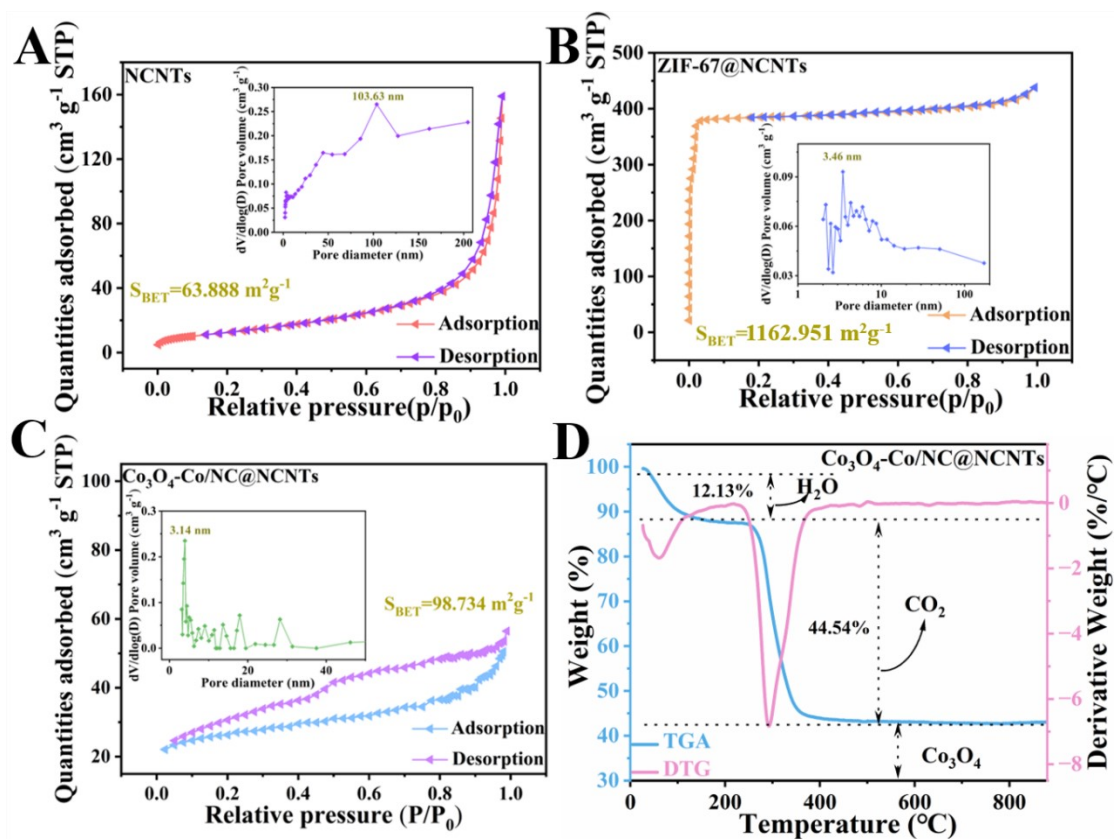

**Figure S2.** (A-C) N<sub>2</sub> adsorption-desorption isotherm, inset is pore size distribution curve of NCNTs, ZIF-67@NCNTs and Co<sub>3</sub>O<sub>4</sub>-Co/NC@NCNTs composite. (D) TG curve of Co<sub>3</sub>O<sub>4</sub>-Co/NC@NCNTs composite.

**X-ray photoelectron spectra of 1D structured Co<sub>3</sub>O<sub>4</sub>-Co/NC@NCNTs composite materials.**

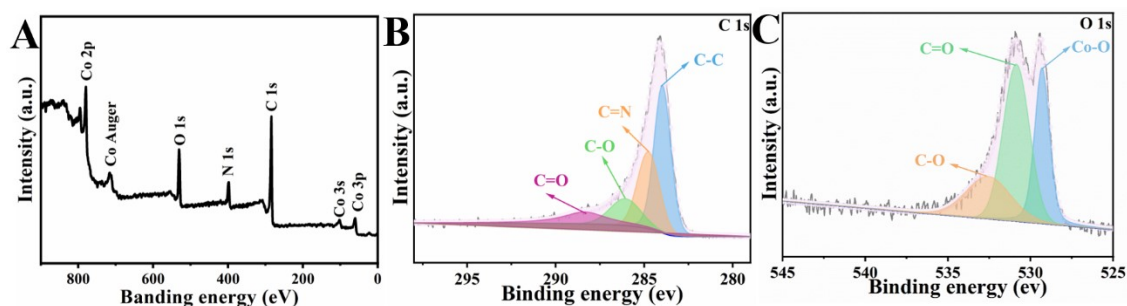

**Figure S3.** X-ray photoelectron spectra of Co<sub>3</sub>O<sub>4</sub>-Co/NC@NCNTs composite: (A) full spectra, high resolution (B) C 1s and (C) O 1s.

## Lithium storage mechanism discussion.

In order to explore the possible reasons for enhancing cyclic stability and rate performance of the  $\text{Co}_3\text{O}_4\text{-Co/NC@NCNTs}$  electrode, CV tests were performed at a series of scan rates of 0.2-1.0  $\text{mV s}^{-1}$  (Fig. S4A) to investigate the electrochemical kinetics and lithium storage mechanism of the electrode<sup>S1</sup>. The results show that CV curves show similar shape at different scanning rates, and oxidation potential shifted positively with the increase of scanning rate, and the peak intensity of redox increased gradually. In general, the total charge stored while cycling in the electrochemical energy storage device is related to several mechanisms. It can be characterized according to formula (1) and (2) and CV data at different scan rates:

$$i = av^b \#(1)$$

$$\log(i) = b \log(v) + \log(a) \#(2)$$

Where  $i$  represents the current density,  $v$  represents the sweep rate, and  $a$  and  $b$  are constants. The charge storage mechanism is closely related to  $b$  value. When  $b$  value is close to 0.5, the charge storage process is dominated by diffusion control process. On the contrary, when  $b$  value approaches 1.0, it is mainly controlled by capacitive behavior. In Fig. S4B, it can be seen that the  $b$  values of  $\text{Co}_3\text{O}_4\text{-Co/NC@NCNTs}$  from the cathode peak and the anode peak are 0.86 and 0.82, respectively, indicating that both diffusion and capacitance control contribute to the capacity during the cycle. The ratio of capacitance to diffusion contribution can be obtained by formula (3):

$$i(v) = k_1 v + k_2 v^{\frac{1}{2}} \#(3)$$

Among them,  $k_1 v$  and  $k_2 v^{1/2}$  are the contributions of pseudocapacitance control process and diffusion control process, respectively. The distribution of capacitive charge at a scanning rate of 1.0  $\text{mV s}^{-1}$  is fitted in Fig. S4C, where the pseudocapacitance contribution of the blue part is 76.1%. As shown in Fig. S4D as the scan rate increases, so does the proportion of capacitance contribution. When the scan rate changes from 0.2 to 1.0  $\text{mV s}^{-1}$ , the capacitive contribution increases from 59% to 76%. The high

capacitive behavior contribution ratio means that the fast insertion/extraction of  $\text{Li}^+$  of  $\text{Co}_3\text{O}_4\text{-Co/NC@NCNTs}$  helps to achieve superior rate capability and long-term cycle stability at high current density.

To study the electrochemical reaction kinetics of the electrodes, electrochemical impedance spectroscopy (EIS) analysis was performed in Fig. S4E. In general, the ohmic resistance of the battery is related to the intercept value of the  $Z'$  axis semicircle at the high intermediate frequency, while the low-frequency sloping line corresponds to the diffusion of  $\text{Li}^+$  in the electrode<sup>S2</sup>. The resistance of  $\text{Co}_3\text{O}_4\text{-Co/NC@NCNTs}$  electrode is lower than that of NCNTs and ZIF-67@NCNTs electrodes, indicating that the  $\text{Co}_3\text{O}_4\text{-Co/NC@NCNTs}$  has better conductivity and faster charge transfer kinetics. In order to further clarify the diffusion kinetics of  $\text{Li}^+$  in the electrode material, the  $Z' - \omega^{1/2}$  in the low frequency region of the EIS curve was fitted according to the formula  $Z' = R_e + R_{ct} + \sigma\omega^{-1/2}$  and the corresponding fitting calculation was performed (Fig. S4F). The fitting results can be estimated by the formula  $D_{\text{Li}^+} = R^2 T^2 / 2n^4 F^4 C^2 \sigma^2 A^2$ , that is, the diffusion rate of  $\text{Li}^+$  is inversely proportional to the slope of the sloping line in Fig. S4F. The slope of the electrodes of NCNTs, ZIF-67@NCNTs and  $\text{Co}_3\text{O}_4\text{-Co/NC@NCNTs}$  by fitting calculation are 114.1, 113.9 and 27.3, respectively. It is shown that the  $\text{Co}_3\text{O}_4\text{-Co/NC@NCNTs}$  electrode has the smallest slope, which proves that it has the fastest  $\text{Li}^+$  diffusion kinetics, and thus improves the electrochemical reaction kinetics and rate performance.



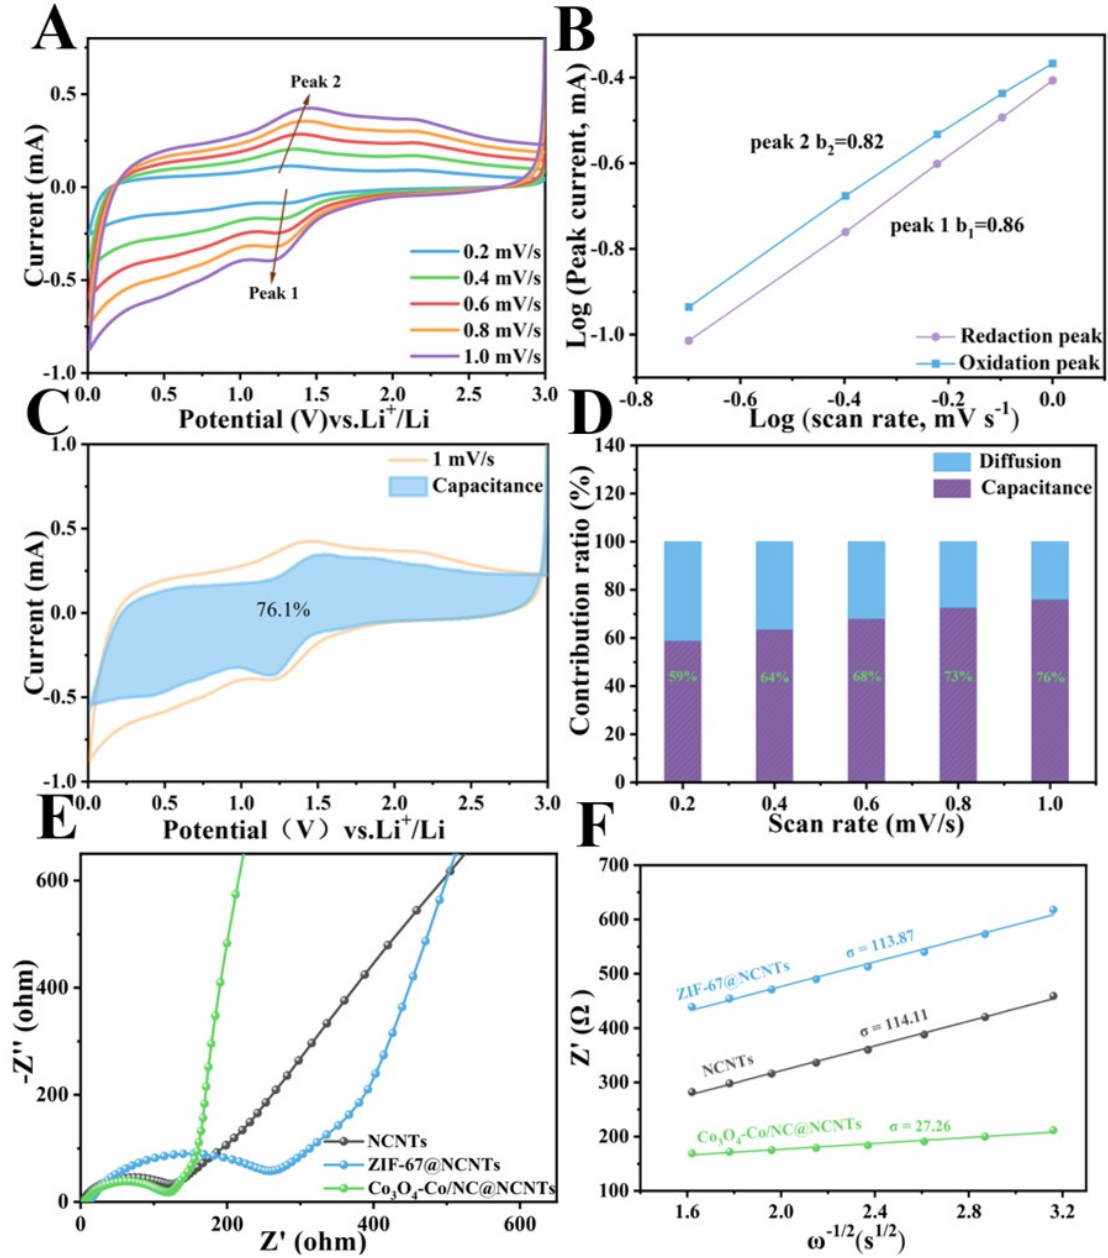

**Figure S4.** (A) CV curves at different sweep rates for the  $\text{Co}_3\text{O}_4\text{-Co/NC@NCNTs}$  electrode. (B) Fitted log (peak current) vs log (sweep rate) corresponding to certain electrochemical reactions. (C) The CV curve at a sweep rate of 1  $\text{mV s}^{-1}$  marking the pseudocapacity contribution (blue region) in comparison to the total current. (D) Capacity contribution at various sweep rates. (E) Nyquist plots of the NCNTs, ZIF-67@NCNTs and  $\text{Co}_3\text{O}_4\text{-Co/NC@NCNTs}$  electrodes. (F) Real parts of the complex impedances vs.  $\omega^{-1/2}$  (angular frequency).

**Table S1** Comparison of lithium storage performance of some Co-based anode materials.

| Sample                                                 | Current density<br>(A g <sup>-1</sup> ) | Number of cycles | Capacity<br>(mAh g <sup>-1</sup> ) | Synthesis complexity | Stability | Cost   | Reference       |
|--------------------------------------------------------|-----------------------------------------|------------------|------------------------------------|----------------------|-----------|--------|-----------------|
| Cry–<br>Co <sub>3</sub> O <sub>4</sub> /Co@N–C–<br>700 | 0.2                                     | 50               | 617.4                              | medium               | low       | low    | 3               |
| Co–MOFs/rGO                                            | 0.1                                     | 500              | 692.25                             | medium               | medium    | high   | 4               |
| Co/Co <sub>3</sub> O <sub>4</sub> –C                   | 0.5                                     | 200              | 608                                | high                 | high      | high   | 5               |
| CoSe/Co@NC                                             | 0.2                                     | 100              | 630                                | medium               | low       | low    | 6               |
| ES–CNC Co <sub>3</sub> O <sub>4</sub>                  | 1                                       | 700              | 647                                | high                 | high      | high   | 7               |
| G/Co <sub>3</sub> O <sub>4</sub>                       | 0.2                                     | 200              | 714                                | medium               | low       | medium | 8               |
| Co <sub>9</sub> S <sub>8</sub> /C–CNFs                 | 0.5                                     | 150              | 700                                | low                  | low       | low    | 9               |
| Co <sub>3</sub> O <sub>4</sub> /NPC                    | 0.5                                     | 300              | 785                                | high                 | high      | high   | 10              |
| Co <sub>3</sub> O <sub>4</sub> –<br>Co/NC@NCNTs        | 0.1<br>1                                | 100<br>500       | 809.4<br>663.6                     | low                  | high      | low    | This<br>article |

**Note:** *Cry–Co<sub>3</sub>O<sub>4</sub>/Co@N–C–700* (Crystalline–Co<sub>3</sub>O<sub>4</sub>/Co@N-doped carbon–700), *Co–MOFs/rGO* (Co–MOFs/graphene oxide composite), *Co/Co<sub>3</sub>O<sub>4</sub>–C* (porous Co/Co<sub>3</sub>O<sub>4</sub>–C core-branch nanowire arrays), *CoSe/Co@NC* (CoSe/Co nanoparticles wrapped in layered carbon nitride nanosheets), *ES–CNC Co<sub>3</sub>O<sub>4</sub>* (electrospinning of ZIF–67 NPs followed by a thermal treatment), *G/Co<sub>3</sub>O<sub>4</sub>* (Graphene-supported ultrafine Co<sub>3</sub>O<sub>4</sub> nanocrystallites oxides), *Co<sub>9</sub>S<sub>8</sub>/C–CNFs* (Co<sub>9</sub>S<sub>8</sub>/carbonized cellulose nanofibers), *Co<sub>3</sub>O<sub>4</sub>/NPC* (Co<sub>3</sub>O<sub>4</sub> nanoparticles on N-doped porous carbon).

## References

- S1 J. Li, D. Yan, X. Zhang, S. Hou, T. Lu, Y. Yao, L. Pan, *J. Mater. Chem. A* 2017, **5**, 20428.
- S2 Y. Zhao, J. Wang, C. Ma, L. Cao, Z. Shao, *Chem. Eng. J.* 2019, **370**, 536-546.
- S3 S. Guo, J. Liu, Q. Zhang, Y. Jin, H. Wang, *J. Alloys Compd.* 2021, **855**, 157538.
- S4 X. Lang, X. Wang, Y. Liu, K. Cai, L. Li, Q. Zhang, *Int. J. Energy Res.* 2021, **45**, 4811–4820.
- S5 G. Pan, X. Xia, F. Cao, J. Chen, Y. Zhang, *J. Power Sources* 2015, **293**, 585–591.
- S6 Y. Zhou, R. Tian, H. Duan, K. Wang, Y. Guo, H. Li, H. Liu, *J. Power Sources*, 2018, **399**, 223–230.
- S7 C. Zhang, B. Lu, F. Cao, Z. Yu, H. Cong, S. Yu, *J. Mater. Chem. A*, 2018, **6**, 12962–12968.
- S8 Q. Qu, T. Gao, H. Zheng, X. Li, H. Liu, M. Shen, J. Shao, H. Zheng, *Carbon*, 2015, **92**, 119–125.
- S9 S. Guo, P. Zhang, Y. Feng, Z. Wang, X. Li, J. Yao, *J. Alloys Compd.* 2020, **818**, 152911.
- S10 G. Zhuang, Y. Gao, X. Zhou, X. Tao, J. Luo, Y. Gao, Y. Yan, P. Gao, X. Zhong, J. Wang, *Chem. Eng. J.* 2017, **330**, 1255–1264.
